# Supplementary material for: Randomized blinded trial of standardized written patient information before total knee arthroplasty
Source: PLoS One. 2017 Jul 5;12(7):e0178358. doi: 10.1371/journal.pone.0178358 (PMC5497941; doi:10.1371/journal.pone.0178358)
Supplement: S1 Data File — (XLSX) [file pone.0178358.s002.xlsx]

## Sheet: Feuil1
random_grp	age	sexe	ims	niv_etudes	activite_prof	lieux_vie	type_logement	acces_exterieur	acces_interieur	amenagement_domicile	presence_aidant	aidant_aider	hebergement	aides_domicile	type_aides	frequence_aides	aide_marche	perimetre_marche	activite_physique	frequence	type	kine_preop	atcd_ptgpth	dt_preced_interv	lieu_reeducation_atcd	souhait_lieu_reeducation	cause_confiance_ensoi	cause_securite	cause_entourage	cause_reeduc	cause_preference	cause_autre	rapt	lieu_reeducation_today	duree_sejour_chir	womac_descendreescaliers	womac_monterescaliers	womac_releverpositionassise	womac_tenirdebout	womac_pencherenavant	womac_marcheterrainplat	womac_entrersortirvoiture	womac_fairecourses	womac_enfilerchaussettes	womac_sortirlit	womac_enleverchaussettes	womac_setendresurlit	womac_entrersortirbaignoire	womac_sassoir
1	69	2	26	1	2	1	2	2 et 3	1	2	2		2	2			2	1	2			1	2			1	2		1	1	2	2	8	1	8	3	2	3	2	1	2	0	3	2	0	2	1	2	1
1	64	1	43	2	2	3	1	1	1	1	1	1		2			2	3	2			2	2			1	1,2,3	2		1	2	2	5	1	13	4	4	4	3	4	4	2	3	4	3	4	2	4	3
1	71	1	33	2	2	1	2	1	1	2	2		1	2			1	2	2			2	2			1	1	2			2	2	8	1	9	3	3	3	3	2	3	4	4	3	2	3	2	4	2
2	67	1	39	2	2	1	1	1	2	2	2		1	2			1	2	2			1	2			1		1	2 et 4		2	2	5	1	7	3	3	4	3	3	4	4	4	41	2	2	4	3	4
1	71	1	32	1	2	3	1	2	1	1	1	1	1	2			1	2	2			1	1	2	1	1		2	2	1	1	2	9	1	8	1	1	1	3	1	2	0	2	1	1	1	1		1
1	64	2	36	2	2	3	1	1	2	2	1	1	2	2			1	1	2			2	2			1	2		2	1	2	2	11	1	7	3	3	0	2	0	0	2	2	2	0	1	0	2	0
1	69	2	25	2	2	1	1	2	1	2	1	1	2	2			2	1	1	2	2 et 3	1	2			1	2			1	2	2	11	1	9	1	1	3	2	1	1	3	2	3	2	3	1	2	1
2	73	2	36	2	2	1	1	2	1	2	1	1	2	2			2	3	1	2	2	2	1	1	3	1	2			1 et 3	1	1	9	1	9	2	2	0	2	0	2	2	3	3	0	3	0	2	0
2	58	2	28	2	1	2	1	2	1	2	1	1	2	2			2	1	1	2	4	2	2			2	1 et 3	2	1	1 et 3	1	2	12	1	8	1	1	1	1	0	3	0	3	0	0	0	0		0
2	75	1	28	3	2	2	1	2	1	2	2		2	2			2	2	1	1	1 et 4	2	2			3	1 et 2	1 et 2		2	1	2	5	3	8	4	3	4	2	2	1	2	1	4	2	4	1	1	1
1	71	2	35	2	2	3	1	2	1	1	1		1	2			1	1	1	1	1	2	1	2	1	1	2			1	2	2	9	1	10	4	4	4	4	3	2	4	3	4	3	4	4	3	3
1	72	1	24	2	2	3	1	1	1	2	1	2	2	2			1	2	2			1	2			3		1 et 2	2		2	2	5	3	8	4	4	4	3	0	3	4	4	3	3	3	3	3	2
2	67	1	34	2	2	3	1	3	1	1	1	1	2	2			2	1	2			2	2			1	2			1	2	2	10	1	8	3	3	3	2	2	1	2	2	1	2	1	1	1	0
1	74	2	31	2	2	3	1	1		2	1			2			2	1	1	2	4	2	1	2	1	1	3		2	1	2	2	11	1	9	4	2	2	3	2	2	2	2	4	1	3	1	3	2
2	70	1	25	3	2	3	1	2	2	2	2		2	1	2	2	2	3	1	2	3 et 4	1	1	2	1	1			4	1	2	2	7	1	6	3	2	2	3	0	3	1	3	0	0	0	0	0	0
1	72	1	25	2	2	3	1	1	2	1	1	1	1	2			1	1	2			2	1	2	1	1	2			1	2	2	9	1	9	4	4	4	4	3	2	4	3	4	3	4	4	3	3
1	71	1	27	1	2	3	1	1	2	2	1	1	2	1	2	1	1	1	2			1	2			1			2	1	1	2	9	1	8	3	2	1	2	0	3	2	2	1	0	1	0	0	0
1	69	1	40	2	2	3	1	2	3	1	1	2	2	2			2	1	1	1	2	2	1	2	1	1	4	1	4	1	2	2	7	1	9	4	4	3	3	1	2	2	1	4	2	4	0	3	0
2	74	1	23	2	2	3	1	2	3	2	1	1	2	2			2	1	2			2	2			3		1	1	2	1	2	10	3	8	2	1	3	3	3	1	0	2	4	4	4	3	0	2
1	69	1	30	1	2	3	1	3	1	1	1	1	2	2			2	1	2			2	1	2	1	1	2	2	2	1	1	2	10	1	8	2	2	0	3	0	2	2	3	2	2	2	0	2	0
2	55	2	32	2	1	3	1	1	2	1	1	1	1	2			1	2	1	2	4	2	2			1	1 et 2		1	1	1	2	10	1	8	3	3	2	4	3	3	3	4	3	2	3	2	2	2
1	67	2	36	2	2	3	1	1	3	2	1	2	2	2			2	2	2			2	2			1	2			1	2	2	10	1	10	3	2	3	1	2	1	2	1	2	2	2	1	3	2
2	67	1	45	1	2	1	2	1	1	1	2		1	2			1	1	1	2		2	2			3	2 et 3	1 et 2		2	2	2	6	3	14	3	3	1	1	0	1	2	3	3	0	3	0	2	0
2	64	1	29	1	2	2	1	1	1	1	1	1		2			2	1	1	2	4	2	1	1	1	1	2 et 3	2	2	2	2	2	11	1	8	2	1	2	1	1	1	1	1	1	1	1	1	3	1
1	64	2	27	3	2	2	1	1	1	2	1	1		2			2	1	1	1	1 et 4	2	2			1	2			2	1	2	11	1	9	2	1	2	1	1	1	1	1	3	2	2	1	3	0
1	59	1	36	3	1	2	1	1	1	2	1	1	2	1	2	2	2	2	2			2	1	2	1	1			2	1	1	1	9	1	9	4	3	3	2	1	2	3	3	4	2	3	2	4	3
2	69	2	31		2	1	1	1	1	2	1	1		2			2	1	1	1	4	2	2			1		2		1	1	2	11	1	7	2	2	3	2	2	2	2	2	4	3	4	2	3	1
1	68	1	30	2	2	2	1	1	1	2	2		2	2			2	1	1	1	4	1	2			3		1 et 2		2	1	2	7	3	18	4	2	4	1	1	2	3	2	4	4	4	2	4	2
1	74	2	30	1	2	2	1	1	3	2	1	1	1	2			1	1	1	1	4	2	2			1	2			1 et 2	2	2	10	1	8	3	3	3	2	2	2	3	3	2	1	2	1	1	2
1	55	2	33	2	1	2	1	1	1	2	1			2			2	1	1	1	1	2	2			1	1 et 2			1	1	2	12	1	12	3	3	3	2	2	2	3	3	4	2	4	2	4	1
2	73	1			2	1	1	2	1	2	1	1	2	2			1	2	2			2	2			3	2				2	2	8	3	9	3	3	1	1	2	2	3	4	3	2	3	2	4	2
2	65	1	37	2	2	1	2	1 et 2	1	2	2		2	2			1	3	2			1	2			3		1 et 2	2	2	1	2	5	3	10	4	4	4	4	4	2	3	3	3	2	3	4	4	4
2	66	2	30	2		3	1	1	1	2	1			2			2	1	1	2	4	1	2			1	1			1	2	2	11	1	7	3	2	4	2	1	1	2	1	3	3	3	1	3	1
2	71	2	28	2	2	3	1	1	3	2	1			2			2	1	1	1	1 et 2	1	2			1	3		2	1	2	2	11	1	10	3	3	3	1	1	2	4	3	1	1	1	2	3	1
2	59	1	28	3	1	1	2	1	1	2	1	1	1	1	2	1	1	1	1	2	3 et4	1	2			1	2			1	2	2	9	1	8	4	2	2	3	0	3	2	3	1	0	1	1	1	1
2	67	2	38	1	2	3	1	1	2	2	1	2	2	2			1	1	1	1	4	2	2			3		1 et 2	2	2	1	2	6	3	8	3	3	3	2	2	2	3	3	3	2	3	3	3	1
2	68	2	33	3	2	1	2	3	1	2	1	1		2			1	2	1		1 et 4	2	2			3				2	2	2	9	3	13	3	2	3	1	1	2	3	3	3	3	3	2	4	1
2	57	2	27	2	2	2	1	2	3	2	1	1	2	2			2	1	1	2	2	2	2			1	4		2	1	2	2	12	1	10	1	0	0	0	1	2	2	2	1	2	0	0	1	0
1	71	2	24	3	2	2		2	1	2																							11	1	7	3	3	2	1	2	2	3	4	4	3	4	2	3	2
2	72	2	30	1	2	3	1	2	1	1	1	1	2	2			1	1	2			2	2			1	2 et 3		2	1	1	2	10	1	10	4	3	2	1	1	3	3	4	4	2	4		3	3
1	66	2	31	2	2	1	2	1	1	2	1	1	2	2			2	2	1	1	2	2	2			1	2			1	2	2	9	1	7	2	1	3	2	0	2	1	2	2	1	1	0	1	0
1	68	2	32	1	2	2	1	2	2	2	1	1	1	2			1	3	2			2	2			3	1	2	3	2	1	2	3	3	16	3	3	3	3	2	2	4	4	4	3	4	2	4	3
[truncated: 82 more columns]
